# Supplementary material for: Linking diverse salinity responses of 14 almond rootstocks with physiological, biochemical, and genetic determinants
Source: PubMed Central journal article supplement (PMC7712888; doi:10.1038/s41598-020-78036-4), 2020-12-03
Supplement: 41598_2020_78036_MOESM1_ESM.pdf [file 41598_2020_78036_MOESM1_ESM.pdf]

**Linking diverse salinity responses of 14 almond rootstocks with physiological, biochemical, and genetic determinants**

Devinder Sandhu, Amita Kaundal, Biswa R. Acharya, Thomas Forest, Manju Pudussery, Xuan Liu, Jorge F.S. Ferreira, Donald L. Suarez

Supplementary Fig. S1. Performance of 14 almond rootstocks under five ion combinations of irrigation waters. a. Relative survival rate. b. Relative change in trunk diameter. Error bars represent standard errors. Control, control treatment (E.C. = 1.4 dS m<sup>-1</sup>); Na-SO<sub>4</sub>, Na-SO<sub>4</sub> based irrigation water treatment (E.C. = 3.0 dS m<sup>-1</sup>); Na-Cl, Na-Cl based irrigation water treatment (E.C. = 3.0 dS m<sup>-1</sup>); Na-Cl/SO<sub>4</sub>, Na-Cl/SO<sub>4</sub> based irrigation water treatment (E.C. = 3.0 dS m<sup>-1</sup>); Ca/Mg-Cl/SO<sub>4</sub>, Ca/Mg-Cl/SO<sub>4</sub> based irrigation water treatment (E.C. = 3.0 dS m<sup>-1</sup>)

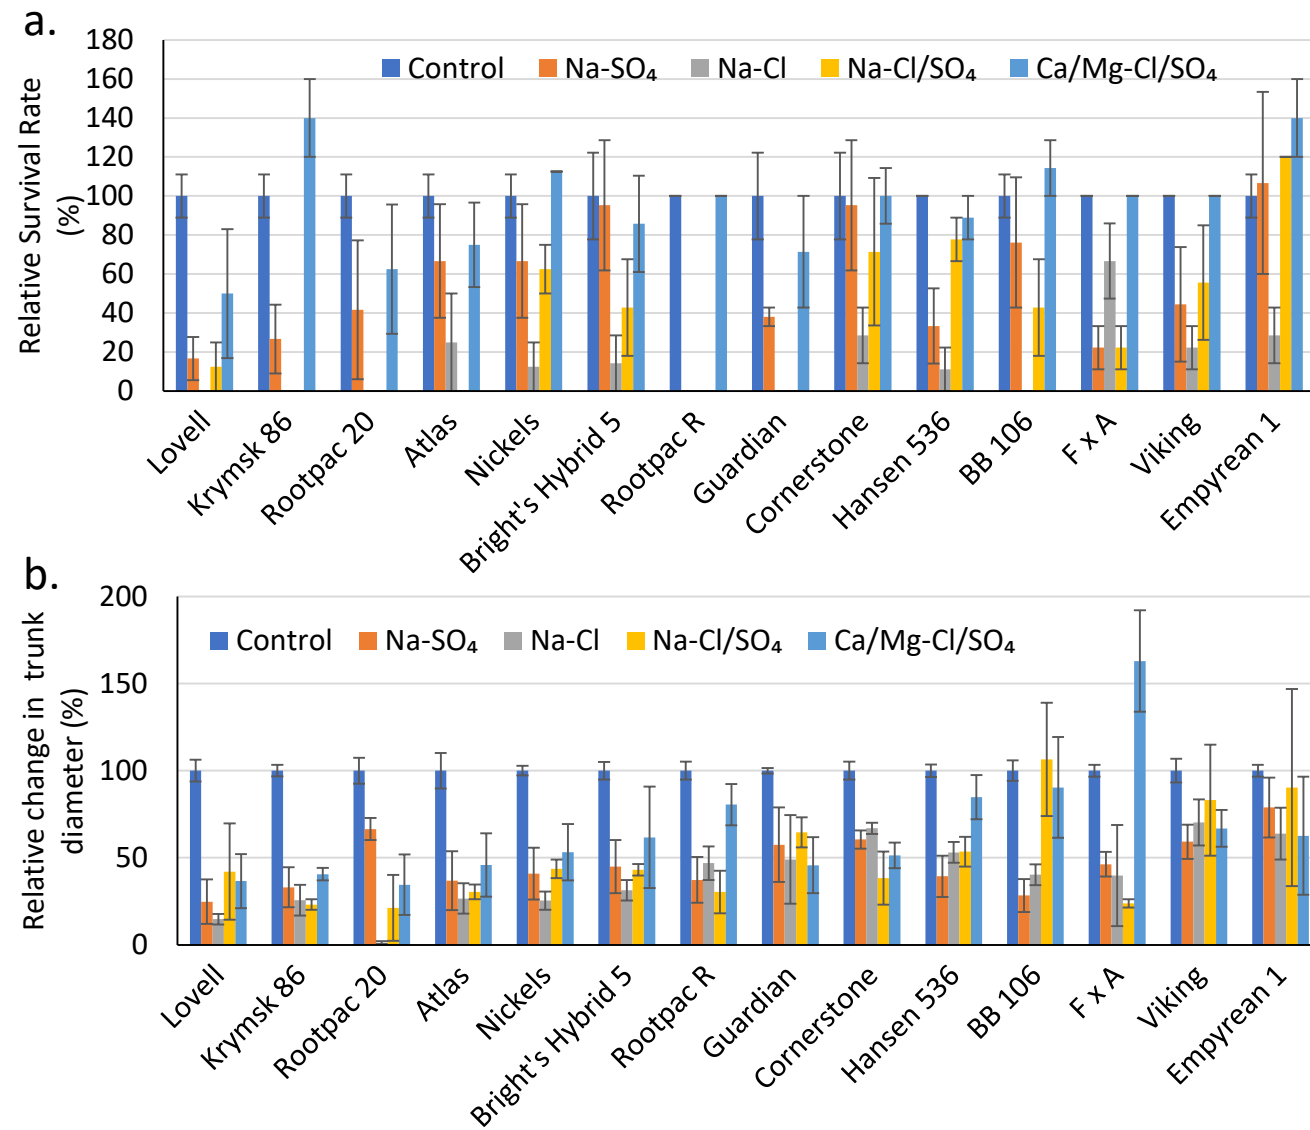

Supplementary Fig. S2. Leaf ion concentrations of 14 almond rootstocks treated with 5 irrigation water treatments. a. Na. b. Cl. c. K. Error bars represent standard errors. Means followed by the same letters are not significantly different according to LSD (0.05).

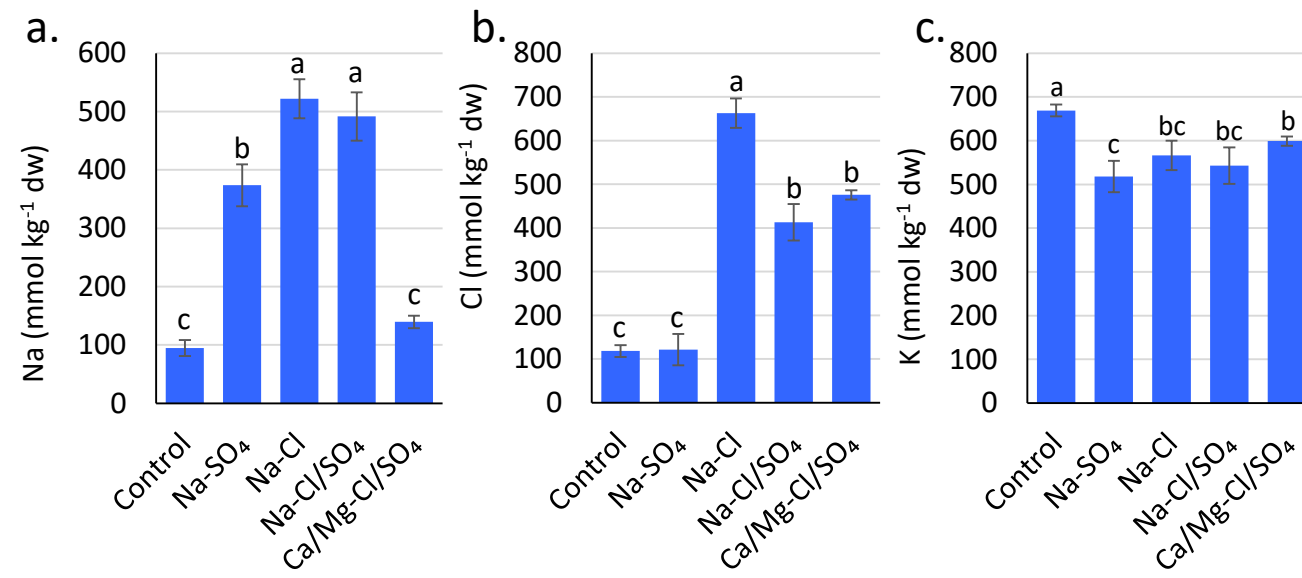

Supplementary Fig. S3. Biochemical parameters evaluated for 14 almond rootstocks treated with 5 irrigation water treatments. a. Oxygen Radical Absorbance Capacity (ORAC) . b. Total Phenolics. c. Proline.. Error bars represent standard errors. Means followed by the same letters are not significantly different according to LSD (0.05). TE, Trolox Equivalents; GAE, Gallic Acid Equivalents

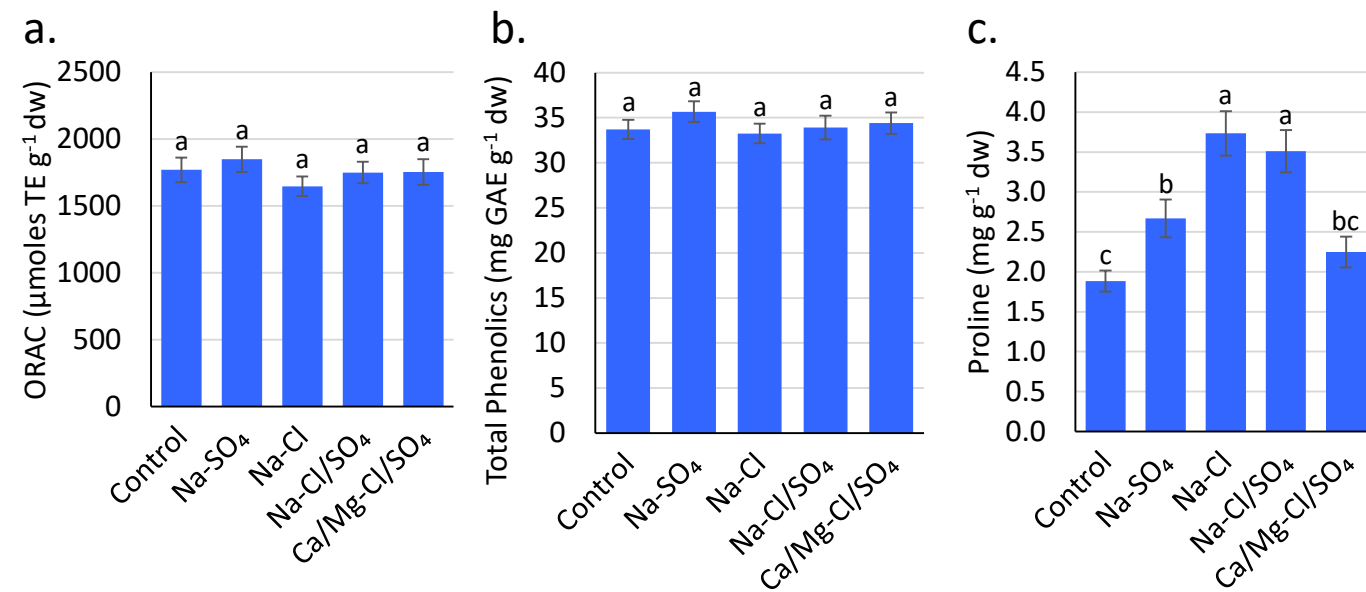

Supplementary Table S1. Leaf ion concentrations of almond rootstocks under five salinity treatments.

**Tissue Na content (mmol kg<sup>-1</sup> DW)**

| Genotype          | Control (T1) |      | Na-SO <sub>4</sub> (T2) |       | Na-Cl (T3) |       | Na-Cl/SO <sub>4</sub> (T4) |       | Ca/Mg-Cl/SO <sub>4</sub> (T5) |      | Mean T2-T4 | % increase |
|-------------------|--------------|------|-------------------------|-------|------------|-------|----------------------------|-------|-------------------------------|------|------------|------------|
|                   | Mean         | SE   | Mean                    | SE    | Mean       | SE    | Mean                       | SE    | Mean                          | SE   |            |            |
| Atlas             | 49.99        | 17.4 | 134.48                  | 42.6  | 426.72     | 10.6  | 364.40                     | 53.1  | 90.18                         | 18.7 | 308.53     | 517.19     |
| BB 106            | 131.16       | 54.2 | 317.27                  | 40.7  | 378.03     | 63.4  | 393.37                     | 51.2  | 199.45                        | 41.6 | 362.89     | 176.68     |
| Bright's Hybrid 5 | 159.62       | 89.3 | 194.94                  | 66.2  | 503.61     | 71.0  | 404.85                     | 97.6  | 121.96                        | 33.8 | 367.80     | 130.42     |
| Cornerstone       | 43.55        | 16.7 | 127.51                  | 33.3  | 285.49     | 16.8  | 208.57                     | 5.5   | 105.20                        | 7.7  | 207.19     | 375.75     |
| Empyrean 1        | 33.22        | 6.9  | 144.55                  | 27.3  | 263.70     | 38.1  | 215.96                     | 45.1  | 152.77                        | 31.8 | 208.07     | 526.34     |
| F x A             | 119.43       | 38.5 | 645.30                  | 117.9 | 666.21     | 114.3 | 661.00                     | 28.3  | 134.92                        | 25.0 | 657.50     | 450.53     |
| Guardian          | 104.97       | 11.3 | 415.05                  | 12.9  | 632.50     | 41.4  | 457.56                     | 83.7  | 188.67                        | 65.2 | 501.70     | 377.95     |
| Hansen 536        | 27.75        | 9.7  | 505.03                  | 61.6  | 672.24     | 89.6  | 801.66                     | 51.8  | 98.24                         | 23.1 | 659.64     | 2277.09    |
| Krymsk 86         | 206.27       | 69.7 | 495.20                  | 48.0  | 612.69     | 32.9  | 598.00                     | 67.0  | 174.80                        | 29.8 | 568.63     | 175.67     |
| Lovell            | 61.22        | 48.1 | 363.90                  | 56.5  | 745.91     | 215.4 | 333.39                     | 39.8  | 117.56                        | 46.0 | 481.07     | 685.80     |
| Nickels           | 68.76        | 56.3 | 281.23                  | 88.4  | 286.72     | 76.4  | 272.57                     | 36.8  | 224.38                        | 48.3 | 280.17     | 307.47     |
| Rootpac 20        | 136.95       | 85.6 | 863.52                  | 45.6  | 791.40     | 60.2  | 997.52                     | 176.2 | 83.08                         | 46.6 | 884.15     | 545.60     |
| Rootpac R         | 135.64       | 45.7 | 581.86                  | 28.0  | 735.74     | 31.7  | 885.49                     | 37.3  | 88.55                         | 12.9 | 734.36     | 441.41     |
| Viking            | 45.98        | 32.4 | 161.30                  | 22.0  | 304.99     | 21.0  | 287.40                     | 41.3  | 172.57                        | 27.8 | 251.23     | 446.39     |

**Tissue Cl content (mmol kg<sup>-1</sup> DW)**

| Genotype          | Control (T1) |       | Na-SO <sub>4</sub> (T2) |      | Na-Cl (T3) |       | Na-Cl/SO <sub>4</sub> (T4) |      | Ca/Mg-Cl/SO <sub>4</sub> (T5) |       | Mean T3-T5 | % increase |
|-------------------|--------------|-------|-------------------------|------|------------|-------|----------------------------|------|-------------------------------|-------|------------|------------|
|                   | Mean         | SE    | Mean                    | SE   | Mean       | SE    | Mean                       | SE   | Mean                          | SE    |            |            |
| Atlas             | 101.66       | 15.0  | 82.48                   | 19.7 | 551.41     | 11.6  | 325.99                     | 33.9 | 423.59                        | 33.6  | 433.66     | 326.58     |
| BB 106            | 120.51       | 42.0  | 129.66                  | 30.4 | 409.85     | 27.3  | 278.16                     | 38.3 | 319.77                        | 9.5   | 335.93     | 178.75     |
| Bright's Hybrid 5 | 104.13       | 45.0  | 104.13                  | 16.4 | 574.10     | 114.2 | 303.15                     | 78.9 | 347.04                        | 5.9   | 408.10     | 291.91     |
| Cornerstone       | 88.70        | 12.8  | 80.61                   | 4.3  | 439.87     | 31.6  | 204.81                     | 11.8 | 407.12                        | 211.7 | 350.60     | 295.26     |
| Empyrean 1        | 54.98        | 8.0   | 50.05                   | 7.0  | 359.21     | 64.5  | 175.86                     | 8.7  | 243.00                        | 32.8  | 259.36     | 371.73     |
| F x A             | 97.06        | 19.2  | 137.93                  | 12.2 | 626.02     | 25.7  | 348.91                     | 22.3 | 339.67                        | 44.0  | 438.20     | 351.47     |
| Guardian          | 160.27       | 12.1  | 247.52                  | 60.9 | 807.37     | 50.6  | 506.28                     | 26.9 | 652.88                        | 125.6 | 655.51     | 309.00     |
| Hansen 536        | 156.85       | 23.8  | 153.68                  | 7.9  | 1203.24    | 37.7  | 835.70                     | 68.5 | 906.51                        | 43.4  | 981.82     | 525.96     |
| Krymsk 86         | 169.88       | 120.2 | 180.53                  | 15.8 | 782.00     | 77.2  | 518.61                     | 86.5 | 445.09                        | 56.4  | 581.90     | 242.54     |
| Lovell            | 46.19        | 32.8  | 93.04                   | 22.1 | 872.64     | 45.7  | 297.60                     | 40.6 | 341.74                        | 30.3  | 503.99     | 991.13     |

|            |        |       |        |      |         |       |        |       |        |       |        |        |
|------------|--------|-------|--------|------|---------|-------|--------|-------|--------|-------|--------|--------|
| Nickels    | 105.70 | 47.7  | 131.00 | 42.4 | 386.47  | 45.7  | 221.50 | 13.2  | 304.52 | 13.0  | 304.16 | 187.76 |
| Rootpac 20 | 265.95 | 122.5 | 149.50 | 48.2 | 1146.78 | 112.0 | 888.04 | 143.3 | 928.82 | 110.7 | 987.88 | 271.45 |
| Rootpac R  | 113.63 | 39.2  | 121.97 | 37.3 | 742.00  | 27.6  | 615.27 | 7.6   | 560.61 | 39.5  | 639.29 | 462.61 |
| Viking     | 71.94  | 33.9  | 72.99  | 4.0  | 378.57  | 10.7  | 264.63 | 42.2  | 440.55 | 136.6 | 361.25 | 402.15 |

### Tissue K content (mmol kg<sup>-1</sup> DW)

| Genotype          | Control (T1) |      | Na-SO <sub>4</sub> (T2) |      | Na-Cl (T3) |       | Na-Cl/SO <sub>4</sub> (T4) |      | Ca/Mg-Cl/SO <sub>4</sub> (T5) |      | Mean T2-T5 | % increase |
|-------------------|--------------|------|-------------------------|------|------------|-------|----------------------------|------|-------------------------------|------|------------|------------|
|                   | Mean         | SE   | Mean                    | SE   | Mean       | SE    | Mean                       | SE   | Mean                          | SE   |            |            |
| Atlas             | 621.32       | 46.2 | 456.16                  | 43.9 | 524.43     | 29.4  | 547.05                     | 25.7 | 576.02                        | 50.8 | 525.92     | -15.36     |
| BB 106            | 549.39       | 37.2 | 411.83                  | 60.1 | 521.22     | 31.3  | 446.08                     | 82.8 | 479.91                        | 37.8 | 464.76     | -15.40     |
| Bright's Hybrid 5 | 516.75       | 40.2 | 412.68                  | 21.8 | 552.84     | 36.3  | 464.57                     | 22.7 | 476.73                        | 27.0 | 476.71     | -7.75      |
| Cornerstone       | 711.04       | 85.6 | 656.18                  | 47.3 | 660.36     | 118.0 | 603.36                     | 61.2 | 676.32                        | 47.4 | 649.06     | -8.72      |
| Empyrean 1        | 429.30       | 60.7 | 373.89                  | 21.8 | 415.79     | 16.0  | 351.48                     | 34.3 | 366.74                        | 7.8  | 376.98     | -12.19     |
| F x A             | 551.17       | 57.4 | 448.06                  | 4.0  | 429.83     | 57.3  | 499.41                     | 20.6 | 518.82                        | 47.6 | 474.03     | -14.00     |
| Guardian          | 777.34       | 87.1 | 466.64                  | 27.4 | 543.96     | 37.3  | 545.97                     | 31.7 | 707.29                        | 11.1 | 565.97     | -27.19     |
| Hansen 536        | 780.35       | 41.6 | 631.21                  | 25.7 | 699.02     | 52.3  | 616.08                     | 44.0 | 704.51                        | 17.5 | 662.71     | -15.08     |
| Krymsk 86         | 704.82       | 12.8 | 510.70                  | 36.6 | 637.99     | 53.6  | 655.29                     | 19.1 | 713.05                        | 49.8 | 629.26     | -10.72     |
| Lovell            | 601.98       | 30.9 | 412.00                  | 42.8 | 473.43     | 83.3  | 422.59                     | 76.8 | 507.98                        | 61.7 | 454.00     | -24.58     |
| Nickels           | 531.78       | 8.0  | 475.12                  | 14.2 | 496.57     | 53.2  | 393.62                     | 31.8 | 482.62                        | 29.7 | 461.98     | -13.13     |
| Rootpac 20        | 1295.71      | 49.0 | 910.85                  | 44.8 | 816.32     | 38.3  | 911.46                     | 23.0 | 1028.25                       | 29.1 | 916.72     | -29.25     |
| Rootpac R         | 764.61       | 26.8 | 550.55                  | 44.9 | 616.39     | 26.7  | 611.35                     | 24.5 | 663.30                        | 47.4 | 610.40     | -20.17     |
| Viking            | 529.18       | 56.9 | 538.15                  | 12.4 | 535.14     | 19.6  | 534.51                     | 42.7 | 483.34                        | 42.6 | 522.79     | -1.21      |

### Tissue Ca Content (mmol kg<sup>-1</sup> DW)

| Genotype          | Control (T1) |      | Na-SO <sub>4</sub> (T2) |      | Na-Cl (T3) |      | Na-Cl/SO <sub>4</sub> (T4) |      | Ca/Mg-Cl/SO <sub>4</sub> (T5) |      | Mean T2-T5 | % increase |
|-------------------|--------------|------|-------------------------|------|------------|------|----------------------------|------|-------------------------------|------|------------|------------|
|                   | Mean         | SE   | Mean                    | SE   | Mean       | SE   | Mean                       | SE   | Mean                          | SE   |            |            |
| Atlas             | 169.96       | 11.8 | 153.22                  | 35.2 | 179.32     | 13.4 | 149.13                     | 1.5  | 226.75                        | 24.4 | 177.11     | 4.20       |
| BB 106            | 287.64       | 45.2 | 255.54                  | 27.6 | 262.03     | 20.0 | 269.55                     | 20.9 | 330.02                        | 23.6 | 279.29     | -2.90      |
| Bright's Hybrid 5 | 195.61       | 16.2 | 228.55                  | 5.7  | 22.95      | 33.7 | 234.02                     | 26.6 | 288.68                        | 15.9 | 193.55     | -1.05      |
| Cornerstone       | 195.23       | 22.2 | 155.69                  | 9.5  | 199.91     | 17.4 | 207.03                     | 17.7 | 262.57                        | 25.3 | 206.30     | 5.67       |
| Empyrean 1        | 278.6        | 1.5  | 209.38                  | 24.0 | 271.1      | 26.3 | 221.44                     | 5.9  | 293.68                        | 7.7  | 248.90     | -10.66     |
| F x A             | 328.81       | 17.4 | 328.49                  | 9.2  | 358.62     | 13.7 | 344.47                     | 18.5 | 404.67                        | 19.5 | 359.06     | 9.20       |
| Guardian          | 280.6        | 17.8 | 280.1                   | 45.6 | 260.1      | 37.4 | 253.81                     | 29.4 | 385.75                        | 16.6 | 294.94     | 5.11       |

|            |        |      |        |      |        |      |        |      |        |       |        |       |
|------------|--------|------|--------|------|--------|------|--------|------|--------|-------|--------|-------|
| Hansen 536 | 286.69 | 16.7 | 247.93 | 13.3 | 287.56 | 21.6 | 298.57 | 20.5 | 455.08 | 43.0  | 322.29 | 12.42 |
| Krymsk 86  | 269.25 | 73.4 | 260.57 | 17.0 | 268.5  | 27.1 | 294.02 | 16.1 | 389.73 | 31.0  | 303.21 | 12.61 |
| Lovell     | 132.37 | 8.6  | 152.61 | 10.3 | 232.65 | 38.6 | 153.31 | 15.1 | 205.42 | 10.5  | 186.00 | 40.51 |
| Nickels    | 338.46 | 37.8 | 265.04 | 20.9 | 363.8  | 10.7 | 337.47 | 6.4  | 360.57 | 13.4  | 331.72 | -1.99 |
| Rootpac 20 | 318.47 | 43.0 | 278.11 | 30.9 | 175.79 | 84.8 | 252.75 | 5.6  | 460.26 | 20.1  | 291.73 | -8.40 |
| Rootpac R  | 233.71 | 11.4 | 172.06 | 30.7 | 183.83 | 5.9  | 155.67 | 3.7  | 337.38 | 5.6   | 212.24 | -9.19 |
| Viking     | 201.41 | 32.9 | 227.02 | 25.6 | 208.21 | 23.7 | 232.78 | 12.2 | 409.36 | 123.7 | 269.34 | 33.73 |

### Tissue Mg Content (mmol kg<sup>-1</sup> DW)

| Genotype          | Control (T1) |      | Na-SO <sub>4</sub> (T2) |      | Na-Cl (T3) |      | Na-Cl/SO <sub>4</sub> (T4) |      | Ca/Mg-Cl/SO <sub>4</sub> (T5) |      | Mean T2-T5 | % increase |
|-------------------|--------------|------|-------------------------|------|------------|------|----------------------------|------|-------------------------------|------|------------|------------|
|                   | Mean         | SE   | Mean                    | SE   | Mean       | SE   | Mean                       | SE   | Mean                          | SE   |            |            |
| Atlas             | 138.11       | 5.7  | 130.63                  | 17.2 | 142.12     | 9.3  | 122.75                     | 7.3  | 214.93                        | 17.3 | 152.61     | 10.50      |
| BB 106            | 175.56       | 14.2 | 165.37                  | 19.6 | 172.95     | 13.4 | 174.39                     | 14.9 | 226.64                        | 23.7 | 184.84     | 5.28       |
| Bright's Hybrid 5 | 164.78       | 13.1 | 173.29                  | 5.2  | 187.79     | 14.3 | 196.2                      | 15.8 | 269.89                        | 16.3 | 206.79     | 25.50      |
| Cornerstone       | 148.24       | 11.2 | 143.86                  | 11.9 | 174.01     | 13.9 | 161.65                     | 5.1  | 195.05                        | 14.7 | 168.64     | 13.76      |
| Empyrean 1        | 190.34       | 4.4  | 154.25                  | 10.7 | 174.5      | 13.4 | 148.32                     | 4.8  | 221.7                         | 8.7  | 174.69     | -8.22      |
| F x A             | 186.74       | 10.2 | 185.49                  | 9.3  | 218.31     | 5.9  | 196.46                     | 20.4 | 270.65                        | 10.3 | 217.73     | 16.59      |
| Guardian          | 206.1        | 10.7 | 201.95                  | 10.9 | 185.23     | 17.8 | 194.42                     | 20.8 | 278.47                        | 14.2 | 215.02     | 4.33       |
| Hansen 536        | 205.89       | 9.9  | 179.81                  | 7.7  | 210.14     | 12.1 | 209.52                     | 2.2  | 388.17                        | 25.7 | 246.91     | 19.92      |
| Krymsk 86         | 251.17       | 63.6 | 231.91                  | 12.3 | 248.34     | 9.3  | 253.33                     | 14.1 | 365.2                         | 10.0 | 274.70     | 9.37       |
| Lovell            | 128.15       | 1.8  | 136.85                  | 4.9  | 185.76     | 12.6 | 135.95                     | 7.7  | 191.66                        | 9.7  | 162.56     | 26.85      |
| Nickels           | 218.89       | 16.1 | 171.98                  | 14.2 | 218.02     | 2.3  | 196.46                     | 12.4 | 270.65                        | 0.4  | 214.28     | -2.11      |
| Rootpac 20        | 229.41       | 19.8 | 186.29                  | 21.3 | 178.93     | 8.4  | 178.3                      | 11.0 | 421.17                        | 19.9 | 241.17     | 5.13       |
| Rootpac R         | 201.26       | 3.0  | 154.06                  | 17.6 | 159.52     | 5.4  | 144.92                     | 8.7  | 386.39                        | 21.0 | 211.22     | 4.95       |
| Viking            | 126.23       | 10.2 | 130.62                  | 7.0  | 141.38     | 12.0 | 142.46                     | 3.5  | 257.32                        | 92.1 | 167.95     | 33.05      |

### Tissue P Content ( mmol kg<sup>-1</sup> DW)

| Genotype          | Control (T1) |     | Na-SO <sub>4</sub> (T2) |     | Na-Cl (T3) |     | Na-Cl/SO <sub>4</sub> (T4) |     | Ca/Mg-Cl/SO <sub>4</sub> (T5) |     | Mean T2-T5 | % increase |
|-------------------|--------------|-----|-------------------------|-----|------------|-----|----------------------------|-----|-------------------------------|-----|------------|------------|
|                   | Mean         | SE  | Mean                    | SE  | Mean       | SE  | Mean                       | SE  | Mean                          | SE  |            |            |
| Atlas             | 58.2         | 2.0 | 86.58                   | 3.8 | 62.68      | 3.3 | 74.05                      | 6.5 | 62.13                         | 3.6 | 71.36      | 22.61      |
| BB 106            | 26.22        | 3.1 | 25.55                   | 2.1 | 27.92      | 1.7 | 28.15                      | 1.5 | 27.52                         | 1.7 | 27.29      | 4.06       |
| Bright's Hybrid 5 | 25.34        | 1.7 | 31.6                    | 2.2 | 33.33      | 3.8 | 30.79                      | 3.5 | 29.14                         | 2.3 | 31.22      | 23.18      |
| Cornerstone       | 46.4         | 1.4 | 55.36                   | 1.4 | 53.36      | 5.0 | 46.93                      | 0.9 | 43.05                         | 1.8 | 49.68      | 7.06       |

|            |       |     |       |     |       |      |       |      |       |      |       |        |
|------------|-------|-----|-------|-----|-------|------|-------|------|-------|------|-------|--------|
| Empyrean 1 | 31.46 | 0.4 | 30.72 | 1.7 | 30.65 | 2.0  | 29.38 | 1.0  | 25.12 | 1.6  | 28.97 | -7.92  |
| F x A      | 44.77 | 7.9 | 38.6  | 1.4 | 37.41 | 3.0  | 46.32 | 7.0  | 40.53 | 1.6  | 40.72 | -9.06  |
| Guardian   | 56.77 | 3.6 | 54.02 | 9.4 | 80.18 | 12.3 | 65.57 | 10.7 | 61.17 | 10.3 | 65.24 | 14.91  |
| Hansen 536 | 62.55 | 3.6 | 65.79 | 3.6 | 68.95 | 3.5  | 77.64 | 6.4  | 62.71 | 1.1  | 68.77 | 9.95   |
| Krymsk 86  | 37.57 | 2.8 | 36.07 | 0.6 | 42.61 | 6.0  | 41.31 | 3.3  | 29.21 | 2.7  | 37.30 | -0.72  |
| Lovell     | 31.81 | 1.9 | 32.99 | 2.0 | 42.44 | 1.5  | 38.35 | 1.4  | 28.91 | 1.9  | 35.67 | 12.14  |
| Nickels    | 35.46 | 1.9 | 30.93 | 1.1 | 34.05 | 4.7  | 34.6  | 4.9  | 25.68 | 1.5  | 31.32 | -11.69 |
| Rootpac 20 | 41.7  | 4.4 | 38.1  | 1.6 | 63.04 | 0.2  | 65.83 | 13.2 | 53.31 | 11.1 | 55.07 | 32.06  |
| Rootpac R  | 41.65 | 3.6 | 57.06 | 6.0 | 56.73 | 8.3  | 70.74 | 4.6  | 47.79 | 3.3  | 58.08 | 39.45  |
| Viking     | 28.79 | 0.8 | 30.09 | 2.0 | 26.84 | 2.0  | 31.92 | 1.0  | 39.6  | 9.2  | 32.11 | 11.54  |

### Tissue S Content ( mmol kg<sup>-1</sup> DW)

| Genotype          | Control (T1) |      | Na-SO <sub>4</sub> (T2) |      | Na-Cl (T3) |      | Na-Cl/SO <sub>4</sub> (T4) |      | Ca/Mg-Cl/SO <sub>4</sub> (T5) |      | Mean T2-T5 | % increase |
|-------------------|--------------|------|-------------------------|------|------------|------|----------------------------|------|-------------------------------|------|------------|------------|
|                   | Mean         | SE   | Mean                    | SE   | Mean       | SE   | Mean                       | SE   | Mean                          | SE   |            |            |
| Atlas             | 59.84        | 2.1  | 91.43                   | 4.4  | 46.72      | 0.7  | 66.77                      | 1.7  | 81.65                         | 4.9  | 71.64      | 19.72      |
| BB 106            | 51.89        | 4.8  | 83.47                   | 6.9  | 50.66      | 4.7  | 71.83                      | 7.5  | 70.89                         | 1.4  | 69.21      | 33.38      |
| Bright's Hybrid 5 | 52.19        | 5.4  | 77.27                   | 8.7  | 52.76      | 7.3  | 74.68                      | 18.6 | 86.54                         | 4.5  | 72.81      | 39.51      |
| Cornerstone       | 62.33        | 3.5  | 89.91                   | 4.3  | 66.27      | 4.6  | 74.23                      | 3.6  | 76.11                         | 2.1  | 76.63      | 22.94      |
| Empyrean 1        | 42.72        | 2.0  | 66.92                   | 5.9  | 46.25      | 5.3  | 52.68                      | 2.3  | 68.57                         | 12.6 | 58.61      | 37.18      |
| F x A             | 52.21        | 4.4  | 122.94                  | 16.2 | 48.68      | 3.6  | 62.71                      | 3.1  | 67.54                         | 4.3  | 75.47      | 44.55      |
| Guardian          | 52.02        | 0.9  | 105.67                  | 19.6 | 48.51      | 2.3  | 71.85                      | 7.5  | 65.05                         | 8.6  | 72.77      | 39.89      |
| Hansen 536        | 94.49        | 7.5  | 301.49                  | 18.4 | 59.89      | 4.0  | 156.85                     | 8.2  | 157.33                        | 12.1 | 168.89     | 78.74      |
| Krymsk 86         | 77.51        | 14.5 | 113.91                  | 7.9  | 55.27      | 2.2  | 85.44                      | 2.4  | 80.94                         | 7.6  | 83.89      | 8.23       |
| Lovell            | 46.1         | 5.2  | 99.6                    | 11.3 | 55.1       | 12.8 | 63.55                      | 2.7  | 66.43                         | 5.9  | 71.17      | 54.38      |
| Nickels           | 52.05        | 4.3  | 94.67                   | 18.2 | 55.3       | 5.1  | 62.33                      | 5.2  | 73.42                         | 2.7  | 71.43      | 37.23      |
| Rootpac 20        | 129.7        | 26.8 | 357.97                  | 19.4 | 64.66      | 10.7 | 175.88                     | 30.9 | 162.24                        | 31.7 | 190.19     | 46.64      |
| Rootpac R         | 75.78        | 3.6  | 183.6                   | 9.0  | 49.94      | 2.8  | 110.45                     | 3.4  | 127.42                        | 4.8  | 117.85     | 55.52      |
| Viking            | 41.06        | 0.6  | 64.29                   | 10.9 | 44.34      | 6.0  | 57.14                      | 4.9  | 94.8                          | 26.2 | 65.14      | 58.65      |

### Tissue B Content (mmol kg<sup>-1</sup> DW)

| Genotype | Control (T1) |     | Na-SO <sub>4</sub> (T2) |     | Na-Cl (T3) |     | Na-Cl/SO <sub>4</sub> (T4) |     | Ca/Mg-Cl/SO <sub>4</sub> (T5) |     | Mean T2-T5 | % increase |
|----------|--------------|-----|-------------------------|-----|------------|-----|----------------------------|-----|-------------------------------|-----|------------|------------|
|          | Mean         | SE  | Mean                    | SE  | Mean       | SE  | Mean                       | SE  | Mean                          | SE  |            |            |
| Atlas    | 3.83         | 0.5 | 4.63                    | 1.4 | 3.11       | 1.1 | 4.21                       | 0.2 | 3.46                          | 0.4 | 3.98       | 4.00       |



|                   |      |     |      |     |       |     |      |     |      |     |      |        |
|-------------------|------|-----|------|-----|-------|-----|------|-----|------|-----|------|--------|
| BB 106            | 3.48 | 0.2 | 2.68 | 0.4 | 2.47  | 0.8 | 2.78 | 0.3 | 3.01 | 0.4 | 2.64 | -24.04 |
| Bright's Hybrid 5 | 3.19 | 0.2 | 2.54 | 0.1 | 3.14  | 1.4 | 2.46 | 0.2 | 2.92 | 0.3 | 2.71 | -14.97 |
| Cornerstone       | 3.38 | 0.3 | 3.20 | 0.1 | 2.76  | 1.0 | 3.00 | 0.4 | 2.87 | 0.4 | 2.99 | -11.60 |
| Empyrean 1        | 4.37 | 0.3 | 3.55 | 0.2 | 2.81  | 1.1 | 3.31 | 0.5 | 3.26 | 0.2 | 3.22 | -26.24 |
| F x A             | 3.75 | 0.3 | 3.14 | 0.2 | 3.23  | 1.3 | 3.66 | 0.3 | 3.17 | 0.3 | 3.34 | -10.84 |
| Guardian          | 3.62 | 0.3 | 3.32 | 0.4 | 3.75  | 1.2 | 3.87 | 0.3 | 3.90 | 0.2 | 3.65 | 0.74   |
| Hansen 536        | 4.66 | 0.1 | 3.43 | 0.2 | 2.73  | 1.1 | 3.61 | 0.3 | 3.91 | 0.1 | 3.26 | -30.11 |
| Krymsk 86         | 4.60 | 0.4 | 4.90 | 0.4 | 4.08  | 1.2 | 4.72 | 0.4 | 3.96 | 0.5 | 4.57 | -0.72  |
| Lovell            | 3.47 | 0.1 | 3.29 | 0.2 | 2.21  | 1.6 | 2.79 | 0.4 | 3.12 | 0.3 | 2.76 | -20.37 |
| Nickels           | 3.26 | 0.2 | 3.26 | 0.3 | 2.01  | 1.8 | 2.89 | 0.2 | 3.18 | 0.2 | 2.72 | -16.56 |
| Rootpac 20        | 3.99 | 0.1 | 3.59 | 0.4 | 4.81  | 1.0 | 4.40 | 0.6 | 4.93 | 0.2 | 4.27 | 6.93   |
| Rootpac R         | 3.42 | 0.1 | 3.77 | 0.6 | 12.48 | 7.2 | 4.53 | 0.4 | 3.60 | 0.4 | 6.93 | 102.53 |
| Viking            | 3.76 | 0.1 | 3.19 | 0.7 | 7.33  | 3.8 | 3.22 | 0.6 | 3.47 | 0.2 | 4.58 | 21.81  |

### Tissue Cu Content (mmol kg<sup>-1</sup> DW)

| Genotype          | Control (T1) |       | Na-SO <sub>4</sub> (T2) |       | Na-Cl (T3) |       | Na-Cl/SO <sub>4</sub> (T4) |       | Ca/Mg-Cl/SO <sub>4</sub> (T5) |       | Mean T2-T5 | % increase |
|-------------------|--------------|-------|-------------------------|-------|------------|-------|----------------------------|-------|-------------------------------|-------|------------|------------|
|                   | Mean         | SE    | Mean                    | SE    | Mean       | SE    | Mean                       | SE    | Mean                          | SE    |            |            |
| Atlas             | 0.049        | 0.006 | 0.078                   | 0.019 | 0.061      | 0.001 | 0.050                      | 0.010 | 0.047                         | 0.011 | 0.047      | -4.26      |
| BB 106            | 0.042        | 0.004 | 0.045                   | 0.004 | 0.054      | 0.011 | 0.041                      | 0.009 | 0.034                         | 0.013 | 0.035      | -17.10     |
| Bright's Hybrid 5 | 0.035        | 0.006 | 0.048                   | 0.007 | 0.046      | 0.012 | 0.037                      | 0.009 | 0.031                         | 0.009 | 0.032      | -8.47      |
| Cornerstone       | 0.040        | 0.003 | 0.040                   | 0.006 | 0.048      | 0.009 | 0.035                      | 0.012 | 0.026                         | 0.004 | 0.030      | -26.29     |
| Empyrean 1        | 0.040        | 0.004 | 0.044                   | 0.006 | 0.048      | 0.014 | 0.031                      | 0.015 | 0.031                         | 0.009 | 0.031      | -23.18     |
| F x A             | 0.072        | 0.014 | 0.071                   | 0.008 | 0.073      | 0.016 | 0.049                      | 0.012 | 0.057                         | 0.008 | 0.050      | -30.07     |
| Guardian          | 0.043        | 0.006 | 0.046                   | 0.005 | 0.047      | 0.013 | 0.041                      | 0.013 | 0.026                         | 0.011 | 0.032      | -25.72     |
| Hansen 536        | 0.046        | 0.002 | 0.054                   | 0.006 | 0.065      | 0.011 | 0.054                      | 0.009 | 0.040                         | 0.013 | 0.043      | -8.19      |
| Krymsk 86         | 0.062        | 0.010 | 0.070                   | 0.007 | 0.067      | 0.012 | 0.048                      | 0.014 | 0.035                         | 0.010 | 0.044      | -29.03     |
| Lovell            | 0.040        | 0.002 | 0.060                   | 0.008 | 0.053      | 0.013 | 0.046                      | 0.016 | 0.034                         | 0.013 | 0.039      | -4.46      |
| Nickels           | 0.053        | 0.004 | 0.059                   | 0.011 | 0.060      | 0.007 | 0.043                      | 0.012 | 0.032                         | 0.010 | 0.039      | -26.98     |
| Rootpac 20        | 0.076        | 0.005 | 0.107                   | 0.004 | 0.110      | 0.007 | 0.089                      | 0.019 | 0.068                         | 0.006 | 0.075      | -1.58      |
| Rootpac R         | 0.074        | 0.007 | 0.102                   | 0.008 | 0.094      | 0.015 | 0.073                      | 0.020 | 0.061                         | 0.002 | 0.066      | -10.81     |
| Viking            | 0.032        | 0.002 | 0.042                   | 0.005 | 0.035      | 0.006 | 0.033                      | 0.014 | 0.048                         | 0.012 | 0.032      | -1.44      |

### Tissue Fe Content (mmol kg<sup>-1</sup> DW)

| Genotype          | Control (T1) |     | Na-SO <sub>4</sub> (T2) |     | Na-Cl (T3) |     | Na-Cl/SO <sub>4</sub> (T4) |     | Ca/Mg-Cl/SO <sub>4</sub> (T5) |     | Mean T2-T5 | % increase |
|-------------------|--------------|-----|-------------------------|-----|------------|-----|----------------------------|-----|-------------------------------|-----|------------|------------|
|                   | Mean         | SE  | Mean                    | SE  | Mean       | SE  | Mean                       | SE  | Mean                          | SE  |            |            |
| Atlas             | 4.59         | 1.1 | 4.67                    | 1.2 | 3.26       | 0.8 | 3.49                       | 0.1 | 3.73                          | 0.1 | 3.79       | -17.48     |
| BB 106            | 4.71         | 1.0 | 3.78                    | 0.3 | 4.18       | 0.4 | 4.32                       | 0.4 | 3.86                          | 0.2 | 4.04       | -14.33     |
| Bright's Hybrid 5 | 4.07         | 0.3 | 4.60                    | 0.4 | 4.71       | 0.4 | 4.66                       | 0.5 | 4.47                          | 0.5 | 4.61       | 13.27      |
| Cornerstone       | 4.58         | 0.7 | 4.29                    | 0.5 | 4.85       | 0.7 | 5.00                       | 0.3 | 4.94                          | 0.2 | 4.77       | 4.15       |
| Empyrean 1        | 3.99         | 0.3 | 4.04                    | 0.4 | 4.04       | 0.1 | 3.99                       | 0.6 | 3.92                          | 0.5 | 4.00       | 0.19       |
| F x A             | 5.01         | 0.1 | 5.32                    | 0.4 | 4.99       | 0.6 | 4.94                       | 0.2 | 4.86                          | 0.3 | 5.03       | 0.35       |
| Guardian          | 4.37         | 0.3 | 4.59                    | 0.1 | 5.57       | 0.6 | 5.23                       | 0.7 | 4.77                          | 0.4 | 5.04       | 15.33      |
| Hansen 536        | 3.57         | 0.3 | 4.17                    | 0.4 | 4.21       | 0.5 | 5.04                       | 0.5 | 4.02                          | 0.3 | 4.36       | 22.13      |
| Krymsk 86         | 3.98         | 0.3 | 4.25                    | 0.2 | 4.63       | 0.8 | 5.36                       | 0.5 | 4.53                          | 1.2 | 4.69       | 17.90      |
| Lovell            | 4.93         | 0.7 | 5.75                    | 0.3 | 5.87       | 1.4 | 5.66                       | 0.5 | 5.11                          | 0.3 | 5.60       | 13.54      |
| Nickels           | 4.03         | 0.7 | 3.96                    | 0.8 | 4.55       | 0.5 | 3.53                       | 0.6 | 3.76                          | 0.2 | 3.95       | -1.99      |
| Rootpac 20        | 3.75         | 0.2 | 3.46                    | 0.3 | 4.60       | 1.1 | 4.72                       | 0.3 | 3.39                          | 0.4 | 4.04       | 7.80       |
| Rootpac R         | 4.27         | 0.0 | 4.83                    | 0.4 | 4.56       | 0.8 | 3.77                       | 0.4 | 5.11                          | 0.3 | 4.57       | 6.97       |
| Viking            | 3.56         | 0.3 | 3.93                    | 0.0 | 4.20       | 0.6 | 4.88                       | 0.3 | 4.40                          | 0.3 | 4.35       | 22.26      |

### Tissue Mn Content (mmol kg<sup>-1</sup> DW)

| Genotype          | Control (T1) |     | Na-SO <sub>4</sub> (T2) |     | Na-Cl (T3) |     | Na-Cl/SO <sub>4</sub> (T4) |     | Ca/Mg-Cl/SO <sub>4</sub> (T5) |     | Mean T2-T5 | % increase |
|-------------------|--------------|-----|-------------------------|-----|------------|-----|----------------------------|-----|-------------------------------|-----|------------|------------|
|                   | Mean         | SE  | Mean                    | SE  | Mean       | SE  | Mean                       | SE  | Mean                          | SE  |            |            |
| Atlas             | 0.49         | 0.0 | 2.20                    | 2.2 | 0.49       | 0.0 | 1.19                       | 1.0 | 1.22                          | 1.0 | 1.27       | 162.63     |
| BB 106            | 0.44         | 0.1 | 0.41                    | 0.1 | 0.46       | 0.1 | 1.59                       | 1.6 | 1.37                          | 1.0 | 0.96       | 117.40     |
| Bright's Hybrid 5 | 0.37         | 0.0 | 0.42                    | 0.1 | 0.48       | 0.0 | 1.62                       | 1.7 | 1.47                          | 1.4 | 1.00       | 173.22     |
| Cornerstone       | 0.45         | 0.1 | 0.49                    | 0.1 | 0.58       | 0.0 | 1.63                       | 1.5 | 2.75                          | 1.5 | 1.36       | 203.45     |
| Empyrean 1        | 0.62         | 0.0 | 0.52                    | 0.1 | 0.50       | 0.0 | 1.52                       | 1.5 | 1.39                          | 1.1 | 0.98       | 57.38      |
| F x A             | 0.84         | 0.1 | 0.77                    | 0.1 | 0.97       | 0.0 | 1.92                       | 1.5 | 2.02                          | 1.5 | 1.42       | 69.34      |
| Guardian          | 0.52         | 0.0 | 0.49                    | 0.1 | 2.11       | 2.1 | 1.30                       | 1.2 | 1.76                          | 1.6 | 1.42       | 170.60     |
| Hansen 536        | 1.96         | 0.7 | 1.67                    | 1.0 | 0.90       | 0.1 | 2.15                       | 1.6 | 1.70                          | 0.6 | 1.60       | -18.16     |
| Krymsk 86         | 1.67         | 1.2 | 0.91                    | 0.1 | 1.07       | 0.2 | 2.17                       | 1.5 | 1.60                          | 0.5 | 1.44       | -13.92     |
| Lovell            | 0.34         | 0.0 | 0.40                    | 0.0 | 0.45       | 0.0 | 1.53                       | 1.5 | 1.58                          | 1.5 | 0.99       | 194.64     |
| Nickels           | 0.51         | 0.0 | 1.05                    | 0.8 | 0.60       | 0.1 | 1.48                       | 1.4 | 1.38                          | 1.1 | 1.13       | 119.55     |
| Rootpac 20        | 1.38         | 1.2 | 0.65                    | 0.0 | 1.86       | 1.7 | 2.63                       | 1.4 | 1.43                          | 1.1 | 1.64       | 18.93      |
| Rootpac R         | 1.50         | 1.2 | 0.59                    | 0.1 | 0.52       | 0.0 | 1.34                       | 1.4 | 1.92                          | 1.6 | 1.09       | -27.18     |

|        |      |     |      |     |      |     |      |     |      |     |      |        |
|--------|------|-----|------|-----|------|-----|------|-----|------|-----|------|--------|
| Viking | 0.46 | 0.1 | 0.50 | 0.1 | 1.54 | 1.4 | 1.50 | 1.3 | 1.47 | 0.9 | 1.25 | 169.77 |
|        |      |     |      |     |      |     |      |     |      |     |      |        |

### Tissue Mo Content (mmol kg<sup>-1</sup> DW)

| Genotype          | Control (T1) |       | Na-SO <sub>4</sub> (T2) |       | Na-Cl (T3) |       | Na-Cl/SO <sub>4</sub> (T4) |       | Ca/Mg-Cl/SO <sub>4</sub> (T5) |       | Mean T2-T5 | % increase |
|-------------------|--------------|-------|-------------------------|-------|------------|-------|----------------------------|-------|-------------------------------|-------|------------|------------|
|                   | Mean         | SE    | Mean                    | SE    | Mean       | SE    | Mean                       | SE    | Mean                          | SE    |            |            |
| Atlas             | 0.009        | 0.001 | 0.018                   | 0.013 | 0.009      | 0.002 | 0.011                      | 0.005 | 0.010                         | 0.007 | 0.012      | 33.33      |
| BB 106            | 0.013        | 0.005 | 0.022                   | 0.003 | 0.022      | 0.003 | 0.023                      | 0.003 | 0.018                         | 0.004 | 0.021      | 63.46      |
| Bright's Hybrid 5 | 0.011        | 0.005 | 0.019                   | 0.003 | 0.021      | 0.003 | 0.021                      | 0.005 | 0.021                         | 0.007 | 0.021      | 93.40      |
| Cornerstone       | 0.007        | 0.001 | 0.010                   | 0.002 | 0.012      | 0.003 | 0.013                      | 0.008 | 0.003                         | 0.001 | 0.010      | 35.71      |
| Empyrean 1        | 0.029        | 0.003 | 0.039                   | 0.004 | 0.035      | 0.005 | 0.030                      | 0.007 | 0.033                         | 0.006 | 0.034      | 18.10      |
| F x A             | 0.015        | 0.003 | 0.027                   | 0.003 | 0.028      | 0.005 | 0.018                      | 0.008 | 0.014                         | 0.004 | 0.022      | 45.00      |
| Guardian          | 0.011        | 0.003 | 0.017                   | 0.004 | 0.014      | 0.005 | 0.018                      | 0.007 | 0.015                         | 0.004 | 0.016      | 45.45      |
| Hansen 536        | 0.001        | 0.002 | 0.007                   | 0.006 | 0.011      | 0.002 | 0.010                      | 0.007 | 0.010                         | 0.000 | 0.010      | 955.56     |
| Krymsk 86         | 0.041        | 0.003 | 0.055                   | 0.011 | 0.045      | 0.007 | 0.044                      | 0.008 | 0.038                         | 0.004 | 0.046      | 10.98      |
| Lovell            | 0.029        | 0.001 | 0.039                   | 0.004 | 0.025      | 0.008 | 0.031                      | 0.006 | 0.025                         | 0.004 | 0.030      | 3.45       |
| Nickels           | 0.011        | 0.002 | 0.024                   | 0.006 | 0.023      | 0.004 | 0.015                      | 0.004 | 0.014                         | 0.004 | 0.019      | 73.41      |
| Rootpac 20        | 0.029        | 0.001 | 0.050                   | 0.004 | 0.031      | 0.004 | 0.032                      | 0.006 | 0.032                         | 0.002 | 0.036      | 25.09      |
| Rootpac R         | 0.024        | 0.002 | 0.038                   | 0.004 | 0.037      | 0.003 | 0.023                      | 0.007 | 0.025                         | 0.004 | 0.031      | 28.13      |
| Viking            | 0.017        | 0.002 | 0.020                   | 0.001 | 0.025      | 0.005 | 0.019                      | 0.005 | 0.019                         | 0.006 | 0.021      | 22.06      |

### Tissue Content Zn (mmol kg<sup>-1</sup> DW)

| Genotype          | Control (T1) |       | Na-SO <sub>4</sub> (T2) |       | Na-Cl (T3) |       | Na-Cl/SO <sub>4</sub> (T4) |       | Ca/Mg-Cl/SO <sub>4</sub> (T5) |       | Mean T2-T5 | % increase |
|-------------------|--------------|-------|-------------------------|-------|------------|-------|----------------------------|-------|-------------------------------|-------|------------|------------|
|                   | Mean         | SE    | Mean                    | SE    | Mean       | SE    | Mean                       | SE    | Mean                          | SE    |            |            |
| Atlas             | 0.25         | 0.023 | 0.28                    | 0.084 | 0.32       | 0.053 | 0.28                       | 0.021 | 0.26                          | 0.015 | 0.28       | 13.30      |
| BB 106            | 0.17         | 0.017 | 0.16                    | 0.003 | 0.21       | 0.015 | 0.16                       | 0.012 | 0.16                          | 0.004 | 0.17       | 1.32       |
| Bright's Hybrid 5 | 0.15         | 0.005 | 0.15                    | 0.019 | 0.23       | 0.035 | 0.15                       | 0.019 | 0.16                          | 0.005 | 0.17       | 15.00      |
| Cornerstone       | 0.22         | 0.007 | 0.24                    | 0.012 | 0.27       | 0.042 | 0.20                       | 0.013 | 0.22                          | 0.014 | 0.23       | 5.80       |
| Empyrean 1        | 0.19         | 0.020 | 0.16                    | 0.001 | 0.20       | 0.025 | 0.14                       | 0.009 | 0.16                          | 0.010 | 0.16       | -14.08     |
| F x A             | 0.19         | 0.035 | 0.21                    | 0.037 | 0.17       | 0.018 | 0.16                       | 0.025 | 0.21                          | 0.031 | 0.19       | -0.26      |
| Guardian          | 0.22         | 0.010 | 0.24                    | 0.028 | 0.29       | 0.018 | 0.29                       | 0.031 | 0.20                          | 0.005 | 0.25       | 15.34      |
| Hansen 536        | 0.26         | 0.027 | 0.33                    | 0.036 | 0.32       | 0.028 | 0.25                       | 0.024 | 0.27                          | 0.027 | 0.29       | 12.50      |
| Krymsk 86         | 0.22         | 0.013 | 0.19                    | 0.010 | 0.21       | 0.018 | 0.17                       | 0.009 | 0.16                          | 0.009 | 0.18       | -17.27     |

|            |      |       |      |       |      |       |      |       |      |       |      |       |
|------------|------|-------|------|-------|------|-------|------|-------|------|-------|------|-------|
| Lovell     | 0.21 | 0.015 | 0.23 | 0.001 | 0.23 | 0.032 | 0.23 | 0.026 | 0.19 | 0.008 | 0.22 | 5.83  |
| Nickels    | 0.17 | 0.010 | 0.17 | 0.015 | 0.19 | 0.008 | 0.21 | 0.024 | 0.14 | 0.019 | 0.18 | 3.82  |
| Rootpac 20 | 0.24 | 0.007 | 0.29 | 0.020 | 0.36 | 0.004 | 0.30 | 0.054 | 0.28 | 0.022 | 0.30 | 26.56 |
| Rootpac R  | 0.22 | 0.013 | 0.25 | 0.001 | 0.24 | 0.014 | 0.23 | 0.027 | 0.21 | 0.006 | 0.23 | 5.23  |
| Viking     | 0.14 | 0.007 | 0.16 | 0.027 | 0.17 | 0.019 | 0.18 | 0.022 | 0.21 | 0.040 | 0.18 | 29.29 |

**Supplementary Table S2. Physiological parameters (Pn, gs, and SPAD) for 14 rootstocks under 5 different treatments of irrigation waters.**

Pn ( $\mu\text{mol CO}_2 \text{ m}^{-2} \text{ s}^{-1}$ )

| Rootstock         | Control |      | Na-SO <sub>4</sub> |      | Na-Cl |      | Na-Cl/SO <sub>4</sub> |      | Ca/Mg-Cl/SO <sub>4</sub> |      |
|-------------------|---------|------|--------------------|------|-------|------|-----------------------|------|--------------------------|------|
|                   | Mean    | S.E. | Mean               | S.E. | Mean  | S.E. | Mean                  | S.E. | Mean                     | S.E. |
| Atlas             | 7.53    | 1.15 | 4.83               | 1.10 | 2.50  | 0.35 | 5.97                  | 0.87 | 7.65                     | 0.83 |
| BB 106            | 8.15    | 1.14 | 3.94               | 1.68 | 3.75  | 0.64 | 5.33                  | 0.87 | 5.98                     | 2.16 |
| Bright's Hybrid 5 | 9.78    | 0.54 | 3.61               | 1.40 | 5.07  | 1.28 | 3.97                  | 0.84 | 4.72                     | 0.86 |
| Cornerstone       | 6.30    | 1.40 | 2.81               | 0.88 | 2.27  | 0.70 | 2.94                  | 1.03 | 3.91                     | 0.87 |
| Empyrean 1        | 6.92    | 0.84 | 3.39               | 0.84 | 5.59  | 0.91 | 3.77                  | 0.96 | 4.11                     | 0.50 |
| F x A             | 10.62   | 0.72 | 4.39               | 1.28 | 3.67  | 0.39 | 6.36                  | 1.44 | 8.78                     | 1.24 |
| Guardian          | 4.73    | 1.08 | 5.51               | 1.30 | 2.77  | 0.64 | 4.35                  | 0.96 | 2.57                     | 1.08 |
| Hansen 536        | 12.76   | 0.97 | 6.04               | 1.38 | 5.56  | 1.04 | 5.73                  | 1.63 | 9.07                     | 1.39 |
| Krymsk 86         | 11.45   | 1.75 | 5.19               | 1.59 | 3.86  | 1.00 | 4.38                  | 1.35 | 7.67                     | 1.64 |
| Lovell            | 6.33    | 1.76 | 1.39               | 0.38 | 2.21  | 0.63 | 2.73                  | 1.13 | 3.90                     | 1.32 |
| Nickels           | 10.53   | 0.94 | 5.60               | 0.42 | 7.30  | 1.66 | 6.04                  | 1.65 | 5.99                     | 0.57 |
| Rootpac 20        | 7.18    | 0.15 | 4.12               | 0.58 | 3.45  | 0.81 | 3.09                  | 0.66 | 5.84                     | 1.37 |
| Rootpac R         | 10.08   | 0.93 | 2.98               | 0.55 | 3.76  | 0.35 | 1.85                  | 0.64 | 7.06                     | 1.10 |
| Viking            | 4.75    | 0.75 | 3.66               | 1.01 | 3.77  | 0.51 | 4.30                  | 0.62 | 6.42                     | 0.93 |

gs ( $\text{mol H}_2\text{O m}^{-2} \text{ s}^{-1}$ )

| Rootstock         | Control |        | Na-SO <sub>4</sub> |        | Na-Cl  |        | Na-Cl/SO <sub>4</sub> |        | Ca/Mg-Cl/SO <sub>4</sub> |        |
|-------------------|---------|--------|--------------------|--------|--------|--------|-----------------------|--------|--------------------------|--------|
|                   | Mean    | S.E.   | Mean               | S.E.   | Mean   | S.E.   | Mean                  | S.E.   | Mean                     | S.E.   |
| Atlas             | 0.0908  | 0.0053 | 0.0588             | 0.0122 | 0.0412 | 0.0055 | 0.0918                | 0.0190 | 0.0693                   | 0.0104 |
| BB 106            | 0.1060  | 0.0198 | 0.0592             | 0.0267 | 0.0553 | 0.0085 | 0.0947                | 0.0177 | 0.0905                   | 0.0287 |
| Bright's Hybrid 5 | 0.1027  | 0.0142 | 0.0573             | 0.0187 | 0.0790 | 0.0212 | 0.0652                | 0.0264 | 0.0453                   | 0.0093 |
| Cornerstone       | 0.0743  | 0.0065 | 0.0612             | 0.0158 | 0.0443 | 0.0128 | 0.0587                | 0.0207 | 0.0442                   | 0.0127 |
| Empyrean 1        | 0.0983  | 0.0174 | 0.0412             | 0.0152 | 0.1003 | 0.0229 | 0.0533                | 0.0057 | 0.0535                   | 0.0101 |
| F x A             | 0.1618  | 0.0403 | 0.0847             | 0.0246 | 0.0707 | 0.0107 | 0.1958                | 0.0317 | 0.1374                   | 0.0242 |
| Guardian          | 0.0595  | 0.0154 | 0.0853             | 0.0173 | 0.0414 | 0.0106 | 0.0638                | 0.0073 | 0.0493                   | 0.0169 |
| Hansen 536        | 0.1378  | 0.0132 | 0.0852             | 0.0225 | 0.0900 | 0.0120 | 0.1067                | 0.0198 | 0.1227                   | 0.0077 |
| Krymsk 86         | 0.1495  | 0.0437 | 0.0982             | 0.0395 | 0.0835 | 0.0163 | 0.0987                | 0.0182 | 0.1350                   | 0.0188 |
| Lovell            | 0.0728  | 0.0104 | 0.0218             | 0.0044 | 0.0378 | 0.0105 | 0.0586                | 0.0174 | 0.0460                   | 0.0096 |
| Nickels           | 0.1895  | 0.0406 | 0.0707             | 0.0100 | 0.1302 | 0.0362 | 0.1080                | 0.0385 | 0.0938                   | 0.0110 |

|            |        |        |        |        |        |        |        |        |        |        |
|------------|--------|--------|--------|--------|--------|--------|--------|--------|--------|--------|
| Rootpac 20 | 0.0955 | 0.0037 | 0.0563 | 0.0035 | 0.0608 | 0.0124 | 0.0550 | 0.0100 | 0.0930 | 0.0305 |
| Rootpac R  | 0.1178 | 0.0176 | 0.0786 | 0.0245 | 0.0552 | 0.0059 | 0.0618 | 0.0120 | 0.0807 | 0.0145 |
| Viking     | 0.1188 | 0.0324 | 0.0693 | 0.0210 | 0.0630 | 0.0061 | 0.0783 | 0.0250 | 0.0602 | 0.0058 |

SPAD reading

| Rootstock         | Control |      | Na-SO <sub>4</sub> |      | Na-Cl |      | Na-Cl/SO <sub>4</sub> |      | Ca/Mg-Cl/SO <sub>4</sub> |      |
|-------------------|---------|------|--------------------|------|-------|------|-----------------------|------|--------------------------|------|
|                   | Mean    | S.E. | Mean               | S.E. | Mean  | S.E. | Mean                  | S.E. | Mean                     | S.E. |
| Atlas             | 39.30   | 4.37 | 41.25              | 4.52 | 38.17 | 2.63 | 42.28                 | 1.87 | 48.33                    | 2.71 |
| BB 106            | 39.57   | 1.09 | 37.00              | 1.68 | 41.67 | 1.15 | 38.45                 | 1.25 | 41.77                    | 1.45 |
| Bright's Hybrid 5 | 49.62   | 2.57 | 43.97              | 3.51 | 44.13 | 2.43 | 39.00                 | 3.30 | 45.12                    | 2.15 |
| Cornerstone       | 43.75   | 1.66 | 43.70              | 2.90 | 43.18 | 2.53 | 42.17                 | 2.57 | 38.82                    | 1.02 |
| Empyrean 1        | 43.08   | 1.96 | 33.92              | 3.02 | 38.62 | 1.78 | 37.00                 | 1.36 | 41.27                    | 3.09 |
| F x A             | 42.27   | 1.72 | 38.28              | 2.76 | 35.83 | 2.60 | 36.58                 | 4.30 | 42.78                    | 1.47 |
| Guardian          | 39.92   | 6.91 | 36.23              | 3.33 | 26.83 | 4.07 | 38.42                 | 5.99 | 38.65                    | 2.88 |
| Hansen 536        | 51.27   | 2.16 | 47.42              | 2.48 | 52.07 | 3.40 | 52.85                 | 3.86 | 49.03                    | 2.23 |
| Krymsk 86         | 38.18   | 2.30 | 40.65              | 3.11 | 35.52 | 3.78 | 40.62                 | 2.39 | 44.77                    | 1.59 |
| Lovell            | 47.12   | 4.21 | 41.37              | 3.01 | 41.98 | 4.32 | 45.87                 | 2.82 | 46.90                    | 2.37 |
| Nickels           | 38.85   | 2.21 | 35.80              | 1.11 | 42.28 | 1.86 | 38.92                 | 3.11 | 40.77                    | 2.08 |
| Rootpac 20        | 36.60   | 1.01 | 37.40              | 3.20 | 25.42 | 3.34 | 27.75                 | 4.24 | 31.83                    | 1.25 |
| Rootpac R         | 45.32   | 1.17 | 40.50              | 1.97 | 34.23 | 2.34 | 32.57                 | 2.04 | 42.13                    | 2.68 |
| Viking            | 47.13   | 2.45 | 46.18              | 3.17 | 48.77 | 1.81 | 46.60                 | 2.06 | 53.78                    | 3.11 |

Supp Table S3. Oxygen radical absorbance capacity (ORAC) and total phenolics (PhenolH) evaluated in leaves of 14 almond rootstocks.

| Rootstock         | ORAC ( $\mu\text{moles TE g}^{-1} \text{DM}$ ) |        |                    |        |         |        |                       |        |                          |        |
|-------------------|------------------------------------------------|--------|--------------------|--------|---------|--------|-----------------------|--------|--------------------------|--------|
|                   | Control                                        |        | Na-SO <sub>4</sub> |        | Na-Cl   |        | Na-Cl/SO <sub>4</sub> |        | Ca/Mg-Cl/SO <sub>4</sub> |        |
|                   | Mean                                           | S.E.   | Mean               | S.E.   | Mean    | S.E.   | Mean                  | S.E.   | Mean                     | S.E.   |
| Atlas             | 1201.30                                        | 204.76 | 1397.31            | 54.78  | 1433.35 | 23.05  | 1682.39               | 92.10  | 1512.12                  | 62.58  |
| BB 106            | 1715.79                                        | 48.28  | 1712.38            | 80.48  | 1473.64 | 70.59  | 1656.11               | 93.68  | 1690.98                  | 109.25 |
| Bright's Hybrid 5 | 1680.88                                        | 109.65 | 1676.66            | 62.59  | 1572.97 | 130.52 | 1566.26               | 163.88 | 1508.71                  | 81.83  |
| Cornerstone       | 1589.63                                        | 116.52 | 1694.53            | 113.36 | 1514.21 | 232.55 | 1619.54               | 119.04 | 1623.13                  | 227.19 |
| Empyrean 1        | 1358.69                                        | 59.90  | 1735.17            | 140.80 | 1809.68 | 296.23 | 1750.45               | 59.07  | 1963.96                  | 60.15  |
| F x A             | 1551.08                                        | 3.83   | 1387.36            | 135.29 | 1526.48 | 207.40 | 1660.09               | 260.40 | 1360.13                  | 11.33  |
| Guardian          | 1705.31                                        | 176.97 | 1656.61            | 78.35  | 1695.70 | 129.79 | 1841.82               | 190.24 | 1655.06                  | 33.74  |
| Hansen 536        | 1168.88                                        | 68.10  | 1001.02            | 103.38 | 939.28  | 125.49 | 913.45                | 154.57 | 838.74                   | 76.88  |
| Krymsk 86         | 2776.39                                        | 178.87 | 2932.71            | 331.37 | 2288.30 | 279.63 | 2429.02               | 184.34 | 2632.42                  | 118.75 |
| Lovell            | 2856.26                                        | 435.37 | 3069.52            | 97.65  | 2054.73 | 236.21 | 2584.69               | 66.63  | 2850.90                  | 381.66 |
| Nickels           | 1651.21                                        | 22.16  | 1748.05            | 117.61 | 1589.55 | 128.87 | 1492.79               | 139.55 | 1784.68                  | 47.21  |
| Rootpac 20        | 1823.34                                        | 143.62 | 1776.71            | 149.11 | 1619.37 | 244.93 | 1463.65               | 375.51 | 1600.16                  | 67.35  |
| Rootpac R         | 2527.89                                        | 214.49 | 2475.51            | 103.28 | 2215.73 | 380.46 | 2489.94               | 247.16 | 2370.43                  | 478.27 |
| Viking            | 1240.27                                        | 49.90  | 1471.80            | 88.67  | 1392.84 | 169.27 | 1347.12               | 61.03  | 1087.08                  | 46.42  |

| Rootstock         | phenolH (mg GAE $\text{g}^{-1} \text{DM}$ ) |      |                    |      |       |      |                       |      |                          |      |
|-------------------|---------------------------------------------|------|--------------------|------|-------|------|-----------------------|------|--------------------------|------|
|                   | Control                                     |      | Na-SO <sub>4</sub> |      | Na-Cl |      | Na-Cl/SO <sub>4</sub> |      | Ca/Mg-Cl/SO <sub>4</sub> |      |
|                   | Mean                                        | S.E. | Mean               | S.E. | Mean  | S.E. | Mean                  | S.E. | Mean                     | S.E. |
| Atlas             | 35.63                                       | 2.61 | 38.91              | 3.61 | 42.50 | 1.43 | 44.77                 | 2.99 | 34.50                    | 1.84 |
| BB 106            | 39.46                                       | 0.74 | 41.09              | 3.37 | 38.43 | 2.25 | 36.67                 | 4.49 | 40.41                    | 3.90 |
| Bright's Hybrid 5 | 32.50                                       | 0.69 | 34.24              | 2.32 | 32.13 | 0.98 | 30.17                 | 0.35 | 25.45                    | 3.69 |
| Cornerstone       | 31.56                                       | 1.34 | 34.22              | 0.84 | 31.39 | 3.06 | 31.77                 | 1.42 | 38.31                    | 2.76 |
| Empyrean 1        | 30.13                                       | 1.17 | 32.82              | 0.24 | 34.20 | 2.37 | 33.57                 | 2.03 | 37.68                    | 1.41 |
| F x A             | 30.27                                       | 1.73 | 33.41              | 1.30 | 31.51 | 2.83 | 33.73                 | 4.98 | 32.47                    | 0.06 |
| Guardian          | 32.74                                       | 0.51 | 34.74              | 1.47 | 35.41 | 1.46 | 35.85                 | 1.42 | 33.56                    | 1.12 |
| Hansen 536        | 22.77                                       | 0.92 | 21.24              | 3.17 | 19.72 | 0.77 | 19.45                 | 0.62 | 21.06                    | 1.73 |
| Krymsk 86         | 44.40                                       | 4.30 | 47.72              | 2.41 | 40.55 | 0.89 | 38.82                 | 2.83 | 44.00                    | 1.58 |
| Lovell            | 40.12                                       | 3.27 | 44.30              | 2.64 | 32.11 | 3.24 | 45.44                 | 1.48 | 43.00                    | 1.32 |
| Nickels           | 37.19                                       | 1.12 | 37.63              | 2.83 | 36.04 | 3.15 | 33.03                 | 5.96 | 37.53                    | 0.64 |
| Rootpac 20        | 34.97                                       | 2.74 | 35.38              | 3.28 | 31.85 | 5.23 | 28.27                 | 7.46 | 31.82                    | 3.43 |
| Rootpac R         | 39.31                                       | 3.77 | 38.65              | 2.19 | 37.89 | 2.36 | 36.64                 | 3.33 | 37.21                    | 0.72 |
| Viking            | 23.62                                       | 1.06 | 26.09              | 1.92 | 24.47 | 1.97 | 26.34                 | 3.82 | 21.52                    | 0.51 |

TE, Trolox Equivalents; GAE, Gallic Acid Equivalents

Supp Table S4. Survival rates, leaf Na and Cl concentrations and proline ratios of 14 almond rootstocks.

| Rootstock         | Survival rate (%) | Leaf Na (mmol kg <sup>-1</sup> ) | Leaf Cl (mmol kg <sup>-1</sup> ) | Proline content in T3 (mg g <sup>-1</sup> dw) | Proline content in T1 (mg g <sup>-1</sup> dw) | Proline Ratio (T3/T1) |
|-------------------|-------------------|----------------------------------|----------------------------------|-----------------------------------------------|-----------------------------------------------|-----------------------|
| Atlas             | 46.88             | 426.72                           | 551.41                           | 3.82                                          | 1.71                                          | 2.23                  |
| BB 106            | 64.29             | 378.03                           | 409.85                           | 3.19                                          | 3.08                                          | 1.04                  |
| Bright's Hybrid 5 | 64.29             | 503.61                           | 574.10                           | 2.37                                          | 1.29                                          | 1.84                  |
| Cornerstone       | 67.86             | 285.49                           | 439.87                           | 1.86                                          | 1.68                                          | 1.11                  |
| Empyrean 1        | 90.00             | 263.70                           | 359.21                           | 2.68                                          | 2.57                                          | 1.04                  |
| F x A             | 63.89             | 666.21                           | 626.02                           | 4.70                                          | 1.24                                          | 3.80                  |
| Guardian          | 25.00             | 632.50                           | 807.37                           | 5.71                                          | 2.54                                          | 2.25                  |
| Hansen 536        | 55.56             | 672.24                           | 1203.24                          | 6.00                                          | 2.13                                          | 2.82                  |
| Krymsk 86         | 40.00             | 612.69                           | 782.00                           | 4.34                                          | 0.97                                          | 4.49                  |
| Lovell            | 18.75             | 745.91                           | 872.64                           | 7.33                                          | 2.25                                          | 3.26                  |
| Nickels           | 56.25             | 286.72                           | 386.47                           | 1.48                                          | 1.41                                          | 1.05                  |
| Rootpac 20        | 25.00             | 791.40                           | 1146.78                          | 3.39                                          | 1.48                                          | 2.29                  |
| Rootpac R         | 30.56             | 735.74                           | 742.20                           | 3.72                                          | 1.38                                          | 2.70                  |
| Viking            | 58.33             | 304.99                           | 378.57                           | 3.24                                          | 2.07                                          | 1.56                  |



Supplementary Table S5. Relative expression values of 23 genes in leaves and roots of 14 almond rootstocks under control (T1) and Na-Cl based treatment (T3).

| Genes          | Leaf       |     |             |     |        |     |                   |     |       |     |        |     |         |     |            |     |       |     |           |     |           |     |            |     |          |     |        |     |
|----------------|------------|-----|-------------|-----|--------|-----|-------------------|-----|-------|-----|--------|-----|---------|-----|------------|-----|-------|-----|-----------|-----|-----------|-----|------------|-----|----------|-----|--------|-----|
|                | Empyrean 1 |     | Cornerstone |     | BB 106 |     | Bright's Hybrid 5 |     | F x A |     | Viking |     | Nickels |     | Hansen 536 |     | Atlas |     | Krymsk 86 |     | Rootpac R |     | Rootpac 20 |     | Guardian |     | Lovell |     |
|                | T1         | T3  | T1          | T3  | T1     | T3  | T1                | T3  | T1    | T3  | T1     | T3  | T1      | T3  | T1         | T3  | T1    | T3  | T1        | T3  | T1        | T3  | T1         | T3  | T1       | T3  | T1     | T3  |
| SOS1           | 1.3        | 1.4 | 1.2         | 1.4 | 1.1    | 1.5 | 1.6               | 1.3 | 1.1   | 1.1 | 1.0    | 1.3 | 1.0     | 1.4 | 1.3        | 1.6 | 1.8   | 1.3 | 1.0       | 1.2 | 1.3       | 1.0 | 0.9        | 0.6 | 2.0      | 1.2 | 1.8    | 3.0 |
| SOS2           | 1.0        | 1.4 | 1.2         | 1.2 | 1.1    | 1.4 | 1.2               | 1.2 | 1.3   | 1.2 | 1.7    | 1.4 | 1.0     | 1.1 | 0.7        | 0.8 | 1.1   | 1.2 | 1.1       | 1.0 | 1.0       | 1.0 | 1.4        | 1.3 | 3.0      | 1.7 | 1.7    | 2.9 |
| NHX1           | 0.6        | 0.6 | 0.8         | 0.8 | 0.6    | 0.6 | 0.7               | 0.6 | 0.6   | 0.9 | 0.5    | 0.4 | 0.4     | 0.7 | 0.6        | 0.7 | 0.6   | 0.6 | 0.6       | 0.6 | 0.8       | 0.8 | 1.0        | 0.8 | 0.8      | 0.6 | 0.7    | 0.7 |
| NHX2           | 1.7        | 1.7 | 0.7         | 0.9 | 1.2    | 1.2 | 0.9               | 0.8 | 0.7   | 0.8 | 0.8    | 1.1 | 1.3     | 1.3 | 1.3        | 1.0 | 1.5   | 0.8 | 1.2       | 1.1 | 1.8       | 1.9 | 2.2        | 1.7 | 1.0      | 0.7 | 1.0    | 0.5 |
| AVP1           | 1.8        | 2.5 | 2.5         | 2.9 | 2.0    | 2.2 | 1.8               | 2.0 | 1.8   | 1.9 | 1.6    | 1.4 | 1.7     | 1.6 | 2.0        | 2.3 | 1.4   | 1.6 | 1.4       | 1.1 | 1.4       | 1.5 | 2.6        | 2.5 | 2.3      | 1.9 | 1.4    | 3.3 |
| AKT1           | 0.8        | 0.4 | 0.5         | 0.4 | 0.5    | 0.4 | 0.6               | 0.5 | 0.9   | 0.6 | 1.1    | 1.0 | 0.7     | 1.0 | 0.4        | 0.2 | 0.2   | 0.2 | 0.3       | 0.1 | 0.1       | 0.0 | 0.2        | 0.0 | 0.6      | 0.4 | 0.4    | 0.4 |
| HKT1           | 1.1        | 1.1 | 2.0         | 1.2 | 1.3    | 1.4 | 0.9               | 0.9 | 1.5   | 1.0 | 1.5    | 1.0 | 0.8     | 1.7 | 1.1        | 0.4 | 0.2   | 0.6 | 0.7       | 0.4 | 0.6       | 0.6 | 0.3        | 0.8 | 0.4      | 0.7 | 1.5    | 0.6 |
| SERF1          | 1.9        | 2.5 | 2.5         | 2.3 | 2.1    | 2.3 | 2.3               | 2.0 | 2.4   | 2.7 | 2.4    | 2.3 | 1.8     | 1.8 | 1.9        | 2.2 | 1.6   | 1.8 | 1.8       | 1.7 | 1.8       | 2.0 | 5.8        | 5.3 | 2.9      | 2.0 | 1.6    | 1.6 |
| P5CS1          | 1.3        | 1.1 | 2.5         | 1.4 | 0.9    | 1.0 | 1.7               | 1.6 | 1.7   | 1.9 | 1.2    | 0.8 | 1.7     | 0.8 | 1.0        | 1.2 | 0.8   | 1.0 | 2.1       | 1.1 | 1.1       | 1.0 | 3.1        | 2.6 | 2.1      | 0.9 | 0.6    | 1.3 |
| HSP90.2        | 0.7        | 0.7 | 2.5         | 1.2 | 0.7    | 1.1 | 2.1               | 1.6 | 0.7   | 1.1 | 1.0    | 0.5 | 1.0     | 1.0 | 0.9        | 1.0 | 1.0   | 1.3 | 0.8       | 0.6 | 0.4       | 0.7 | 0.1        | 0.1 | 4.3      | 1.5 | 0.9    | 1.0 |
| HSP90.7        | 0.4        | 0.8 | 0.3         | 0.7 | 0.6    | 0.6 | 0.7               | 0.5 | 0.7   | 1.1 | 1.6    | 2.3 | 0.6     | 0.7 | 0.4        | 0.9 | 1.3   | 0.6 | 1.9       | 1.3 | 0.9       | 1.1 | 2.2        | 2.3 | 3.9      | 1.7 | 0.4    | 2.0 |
| OTS1           | 1.9        | 2.2 | 2.6         | 1.7 | 2.2    | 1.9 | 2.9               | 2.1 | 2.5   | 2.2 | 2.0    | 1.0 | 2.6     | 1.1 | 1.4        | 1.6 | 1.4   | 1.5 | 1.4       | 0.7 | 1.0       | 0.9 | 1.9        | 1.3 | 3.0      | 1.4 | 1.2    | 2.9 |
| SAL1           | 1.5        | 1.7 | 1.8         | 1.5 | 1.7    | 1.6 | 1.6               | 1.2 | 1.1   | 1.1 | 1.7    | 1.2 | 1.1     | 1.0 | 1.2        | 1.3 | 1.4   | 1.3 | 1.7       | 1.2 | 1.5       | 1.2 | 2.2        | 1.5 | 1.7      | 1.9 | 1.1    | 1.0 |
| SGF29          | 1.2        | 1.8 | 3.0         | 1.5 | 1.5    | 1.1 | 1.9               | 2.0 | 1.9   | 1.5 | 1.2    | 1.3 | 2.6     | 1.0 | 1.0        | 1.1 | 1.1   | 1.2 | 0.6       | 0.4 | 0.5       | 0.5 | 0.1        | 0.0 | 2.2      | 1.4 | 0.9    | 2.2 |
| ALMT9          | 1.2        | 1.4 | 3.7         | 1.2 | 1.1    | 1.0 | 1.8               | 1.6 | 1.6   | 1.5 | 1.0    | 1.3 | 1.8     | 1.0 | 1.0        | 0.8 | 0.5   | 0.6 | 0.8       | 0.5 | 0.5       | 0.5 | 1.8        | 1.5 | 1.4      | 1.1 | 0.6    | 1.8 |
| NPF2.4         | 0.8        | 0.7 | 1.6         | 0.5 | 0.6    | 0.6 | 0.8               | 0.4 | 0.9   | 0.9 | 0.5    | 0.3 | 0.5     | 0.3 | 0.5        | 0.4 | 0.3   | 0.2 | 1.0       | 0.5 | 0.3       | 0.4 | 5.5        | 4.1 | 0.6      | 0.3 | 1.4    | 2.2 |
| NPF2.5         | 0.5        | 0.4 | 0.9         | 0.8 | 0.3    | 0.4 | 0.8               | 0.1 | 0.2   | 0.2 | 0.5    | 0.2 | 0.2     | 0.0 | 0.3        | 1.4 | 1.7   | 2.2 | 0.2       | 0.1 | 0.2       | 0.3 | 0.3        | 0.1 | 0.9      | 0.4 | 0.6    | 0.8 |
| SLAH1          | 0.7        | 1.1 | 2.7         | 2.2 | 1.7    | 0.7 | 2.1               | 1.6 | 0.2   | 0.6 | 1.4    | 2.7 | 1.7     | 0.5 | 0.5        | 0.3 | 0.8   | 0.5 | 0.3       | 0.2 | 0.4       | 0.1 | 0.6        | 0.1 | 4.3      | 0.2 | 0.6    | 1.5 |
| SLAH3          | 0.2        | 0.4 | 1.1         | 0.5 | 0.7    | 1.0 | 1.2               | 1.6 | 1.2   | 0.8 | 1.3    | 3.5 | 2.3     | 0.3 | 0.4        | 0.8 | 0.2   | 0.1 | 0.2       | 0.3 | 0.2       | 0.1 | 0.5        | 0.4 | 0.2      | 0.4 | 0.1    | 0.2 |
| CCC            | 2.0        | 2.1 | 4.4         | 2.7 | 1.9    | 1.5 | 3.0               | 1.8 | 1.8   | 1.8 | 1.6    | 1.5 | 2.1     | 1.2 | 1.4        | 1.7 | 1.3   | 1.4 | 2.0       | 2.1 | 1.6       | 1.8 | 5.7        | 5.5 | 2.9      | 1.5 | 1.4    | 1.8 |
| Prupe.6G205700 | 0.1        | 0.0 | 0.0         | 0.1 | 0.0    | 0.0 | 0.1               | 0.0 | 0.1   | 0.0 | 0.0    | 0.0 | 0.0     | 0.0 | 0.0        | 0.1 | 0.0   | 0.0 | 0.0       | 0.0 | 0.0       | 0.0 | 1.0        | 1.7 | 0.0      | 0.0 | 0.0    | 0.0 |
| Prupe.3G273300 | 0.0        | 0.0 | 0.1         | 0.1 | 0.1    | 0.1 | 0.1               | 0.1 | 1.0   | 0.5 | 0.0    | 0.0 | 0.0     | 0.0 | 0.0        | 0.1 | 0.0   | 0.1 | 0.0       | 0.1 | 1.1       | 1.0 | 1.8        | 0.7 | 0.0      | 0.0 | 0.0    | 0.0 |
| Prupe.1G586200 | 1.7        | 0.9 | 0.2         | 0.5 | 0.6    | 0.5 | 0.2               | 0.9 | 0.6   | 1.7 | 0.7    | 1.9 | 0.6     | 1.0 | 0.1        | 0.9 | 0.6   | 3.6 | 1.2       | 1.5 | 0.9       | 5.8 | 0.7        | 7.2 | 0.9      | 4.4 | 0.6    | 0.8 |

| Genes          | Root       |     |             |     |        |     |                   |     |       |     |        |     |         |     |            |     |       |      |           |     |           |     |            |     |          |     |        |     |
|----------------|------------|-----|-------------|-----|--------|-----|-------------------|-----|-------|-----|--------|-----|---------|-----|------------|-----|-------|------|-----------|-----|-----------|-----|------------|-----|----------|-----|--------|-----|
|                | Empyrean 1 |     | Cornerstone |     | BB 106 |     | Bright's Hybrid 5 |     | F x A |     | Viking |     | Nickels |     | Hansen 536 |     | Atlas |      | Krymsk 86 |     | Rootpac R |     | Rootpac 20 |     | Guardian |     | Lovell |     |
|                | T1         | T3  | T1          | T3  | T1     | T3  | T1                | T3  | T1    | T3  | T1     | T3  | T1      | T3  | T1         | T3  | T1    | T3   | T1        | T3  | T1        | T3  | T1         | T3  | T1       | T3  | T1     | T3  |
| SOS1           | 1.7        | 2.0 | 1.1         | 2.2 | 1.6    | 2.0 | 2.2               | 1.7 | 1.6   | 1.6 | 1.3    | 1.6 | 1.3     | 1.3 | 0.9        | 1.6 | 0.6   | 1.2  | 1.3       | 2.3 | 0.5       | 1.0 | 1.0        | 1.1 | 1.2      | 0.5 | 1.1    | 1.3 |
| SOS2           | 3.2        | 3.4 | 2.0         | 2.6 | 3.1    | 3.4 | 2.5               | 2.9 | 2.4   | 2.8 | 3.2    | 3.2 | 2.4     | 2.4 | 1.2        | 1.7 | 3.2   | 4.6  | 1.6       | 2.1 | 1.7       | 1.5 | 0.6        | 0.7 | 2.8      | 2.1 | 2.3    | 2.1 |
| NHX1           | 1.1        | 1.3 | 1.6         | 1.9 | 1.1    | 1.4 | 1.2               | 1.9 | 1.2   | 1.7 | 1.0    | 1.1 | 1.1     | 1.3 | 1.8        | 1.4 | 1.5   | 1.6  | 0.9       | 1.1 | 1.2       | 1.2 | 4.8        | 5.8 | 0.9      | 1.8 | 0.9    | 0.9 |
| NHX2           | 2.1        | 2.1 | 2.0         | 2.2 | 1.9    | 3.2 | 1.9               | 1.4 | 2.1   | 1.9 | 1.4    | 0.9 | 1.8     | 1.8 | 1.8        | 0.7 | 3.0   | 6.5  | 1.1       | 1.4 | 1.4       | 1.4 | 0.9        | 0.7 | 1.8      | 1.8 | 1.3    | 1.3 |
| AVP1           | 1.5        | 2.6 | 1.9         | 2.9 | 1.6    | 1.9 | 3.2               | 2.1 | 2.4   | 2.4 | 1.4    | 1.6 | 2.0     | 2.1 | 0.9        | 2.1 | 1.4   | 0.8  | 1.4       | 2.5 | 1.3       | 1.5 | 2.1        | 1.9 | 1.7      | 0.6 | 1.8    | 1.8 |
| AKT1           | 1.1        | 1.2 | 0.7         | 0.7 | 0.9    | 1.0 | 0.6               | 1.1 | 1.4   | 1.1 | 1.7    | 0.5 | 0.6     | 0.6 | 0.3        | 0.6 | 0.4   | 0.4  | 0.2       | 0.2 | 0.2       | 0.3 | 0.0        | 0.0 | 0.7      | 0.4 | 0.9    | 0.9 |
| HKT1           | 0.5        | 0.4 | 0.0         | 0.3 | 0.4    | 0.9 | 0.9               | 0.6 | 0.6   | 0.7 | 0.4    | 0.2 | 0.1     | 1.1 | 0.2        | 0.2 | 0.8   | 0.1  | 0.9       | 0.4 | 0.1       | 0.1 | 0.1        | 0.2 | 0.0      | 0.2 | 0.6    | 0.1 |
| SERF1          | 2.1        | 3.2 | 3.4         | 4.3 | 2.2    | 3.2 | 1.7               | 3.2 | 2.2   | 3.2 | 2.0    | 2.8 | 2.2     | 3.2 | 2.8        | 3.0 | 2.1   | 3.7  | 2.2       | 2.7 | 2.0       | 3.1 | 3.7        | 4.9 | 2.4      | 1.1 | 1.9    | 2.0 |
| P5CS1          | 1.3        | 1.6 | 2.6         | 2.4 | 1.1    | 4.3 | 0.8               | 1.0 | 1.5   | 2.6 | 1.6    | 1.1 | 1.2     | 1.5 | 1.7        | 2.4 | 2.0   | 4.3  | 1.3       | 1.5 | 1.2       | 1.0 | 0.3        | 0.7 | 1.2      | 0.6 | 1.4    | 1.0 |
| HSP90.2        | 0.6        | 1.7 | 1.0         | 2.0 | 1.7    | 3.6 | 2.3               | 2.5 | 1.1   | 2.0 | 1.0    | 1.6 | 0.7     | 1.9 | 1.4        | 2.1 | 1.1   | 3.7  | 0.4       | 1.7 | 1.9       | 2.5 | 0.1        | 0.2 | 4.0      | 1.4 | 0.9    | 0.9 |
| HSP90.7        | 2.0        | 2.9 | 1.5         | 1.6 | 1.4    | 5.6 | 6.3               | 3.5 | 1.8   | 5.0 | 2.1    | 2.7 | 2.2     | 1.4 | 1.2        | 2.8 | 1.2   | 0.8  | 1.5       | 2.7 | 1.5       | 1.4 | 2.6        | 2.0 | 1.0      | 1.8 | 0.9    | 1.4 |
| OTS1           | 3.3        | 2.2 | 2.7         | 2.4 | 2.0    | 3.3 | 5.7               | 2.3 | 2.2   | 3.1 | 2.8    | 2.3 | 2.7     | 2.0 | 0.7        | 1.2 | 1.2   | 2.2  | 1.0       | 1.3 | 0.6       | 0.7 | 0.3        | 0.2 | 1.7      | 1.1 | 1.3    | 1.1 |
| SAL1           | 1.0        | 1.0 | 1.1         | 1.3 | 1.2    | 1.3 | 1.7               | 1.0 | 1.2   | 1.4 | 1.1    | 0.3 | 1.0     | 0.7 | 0.7        | 0.8 | 0.6   | 0.3  | 0.9       | 1.0 | 0.6       | 0.6 | 0.9        | 0.7 | 0.7      | 0.6 | 0.8    | 0.7 |
| SGF29          | 1.7        | 2.9 | 3.1         | 3.7 | 1.7    | 6.9 | 1.7               | 3.1 | 1.3   | 3.0 | 1.9    | 3.0 | 2.1     | 2.5 | 1.1        | 3.3 | 1.2   | 7.3  | 0.6       | 1.0 | 0.7       | 0.7 | 0.0        | 0.0 | 2.2      | 2.7 | 0.5    | 1.9 |
| ALMT9          | 2.7        | 1.7 | 2.1         | 2.1 | 1.6    | 4.9 | 3.7               | 2.4 | 1.4   | 1.3 | 1.5    | 1.3 | 1.5     | 1.9 | 0.8        | 1.8 | 1.1   | 1.9  | 3.6       | 2.0 | 1.2       | 1.2 | 0.6        | 1.3 | 2.4      | 1.2 | 1.4    | 1.5 |
| NPF2.4         | 2.6        | 2.0 | 0.5         | 0.6 | 2.5    | 6.9 | 1.1               | 0.5 | 1.2   | 0.3 | 0.4    | 0.3 | 2.0     | 1.5 | 0.5        | 4.3 | 0.3   | 0.0  | 0.1       | 0.1 | 0.1       | 0.1 | 0.1        | 0.1 | 0.2      | 0.2 | 0.9    | 0.6 |
| NPF2.5         | 0.0        | 0.0 | 0.0         | 0.0 | 0.0    | 0.0 | 0.0               | 0.0 | 0.0   | 0.0 | 0.0    | 0.0 | 0.0     | 0.0 | 0.0        | 0.0 | 0.0   | 0.0  | 0.0       | 0.0 | 10.4      | 0.0 | 0.0        | 0.0 | 0.0      | 0.0 | 0.0    | 0.0 |
| SLAH1          | 0.8        | 0.6 | 0.8         | 0.1 | 0.3    | 0.6 | 2.1               | 0.8 | 0.4   | 0.4 | 0.6    | 0.5 | 1.9     | 0.6 | 0.1        | 0.1 | 0.0   | 2.0  | 1.5       | 2.7 | 0.1       | 0.4 | 0.1        | 0.1 | 0.2      | 1.3 | 0.5    | 0.3 |
| SLAH3          | 0.3        | 0.4 | 0.5         | 0.4 | 0.4    | 2.8 | 1.8               | 4.6 | 0.6   | 0.4 | 0.5    | 0.8 | 2.0     | 0.6 | 0.1        | 0.8 | 0.0   | 0.1  | 1.5       | 0.9 | 0.0       | 0.7 | 0.0        | 0.2 | 0.2      | 0.3 | 0.1    | 0.3 |
| CCC            | 2.7        | 2.8 | 4.9         | 4.0 | 2.1    | 4.5 | 3.8               | 3.2 | 1.8   | 3.5 | 2.4    | 2.1 | 2.3     | 3.2 | 2.0        | 0.7 | 1.6   | 12.9 | 2.3       | 2.7 | 4.0       | 3.4 | 2.8        | 4.4 | 2.8      | 4.0 | 1.5    | 1.8 |
| Prupe.6G205700 | 1.5        | 0.8 | 3.7         | 3.0 | 2.8    | 3.9 | 32.4              | 0.1 | 0.6   | 0.9 | 2.2    | 0.8 | 3.9     | 1.8 | 4.3        | 3.1 | 1.6   | 0.0  | 0.9       | 1.0 | 0.0       | 0.5 | 3.4        | 6.6 | 1.0      | 0.6 | 1.4    | 0.4 |
| Prupe.3G273300 | 0.0        | 0.0 | 0.6         | 0.0 | 4.6    | 1.1 | 7.2               | 0.9 | 0.0   | 0.7 | 0.0    | 0.0 | 0.2     | 1.2 | 0.5        | 0.0 | 0.0   | 0.1  | 0.3       | 0.0 | 0.0       | 0.9 | 0.1        | 0.0 | 0.0      | 0.0 | 0.0    | 0.0 |
| Prupe.1G586200 | 1.5        | 2.5 | 1.8         | 2.9 | 1.7    | 1.7 | 3.3               | 1.7 | 1.4   | 4.1 | 0.7    | 1.7 | 2.2     | 1.5 | 2.1        | 0.8 | 1.1   | 0.6  | 0.9       | 1.7 | 4.4       | 1.3 | 6.0        | 7.2 | 0.7      | 1.5 | 0.8    | 1.7 |
